# Supplementary material for: High-performance solid catalysts for H2 generation from ammonia borane: progress through synergetic Cu–Ni interactions
Source: Royal Society of Chemistry journal article supplement (doi:10.1039/c3ta13681g), 2013-01-01
Supplement: c3ta13681g.pdf [file c3ta13681g.pdf]

H.Yen and F. Kleitz

## Electronic Supplementary Information

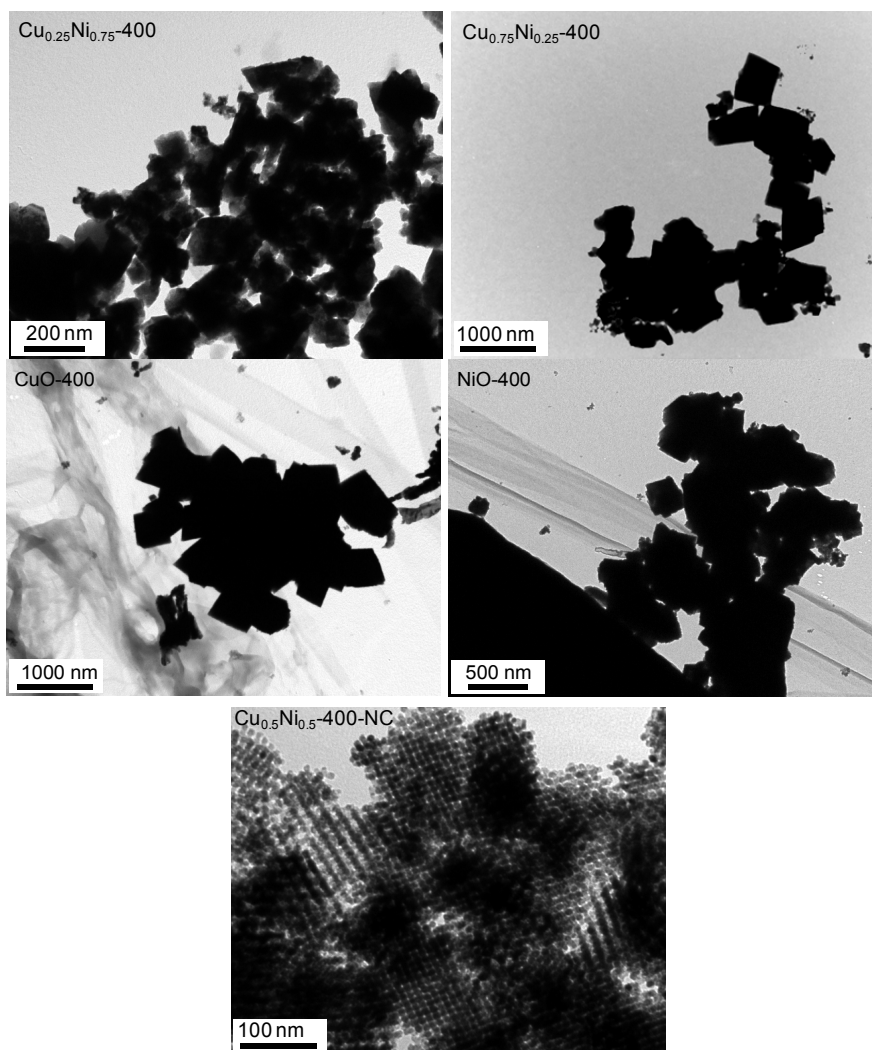

**Fig. S1** Representative TEM images of the samples of different compositions (as indicated) prepared by thermal decomposition of metal nitrate precursors and the nanocasting approach.

H.Yen and F. Kleitz

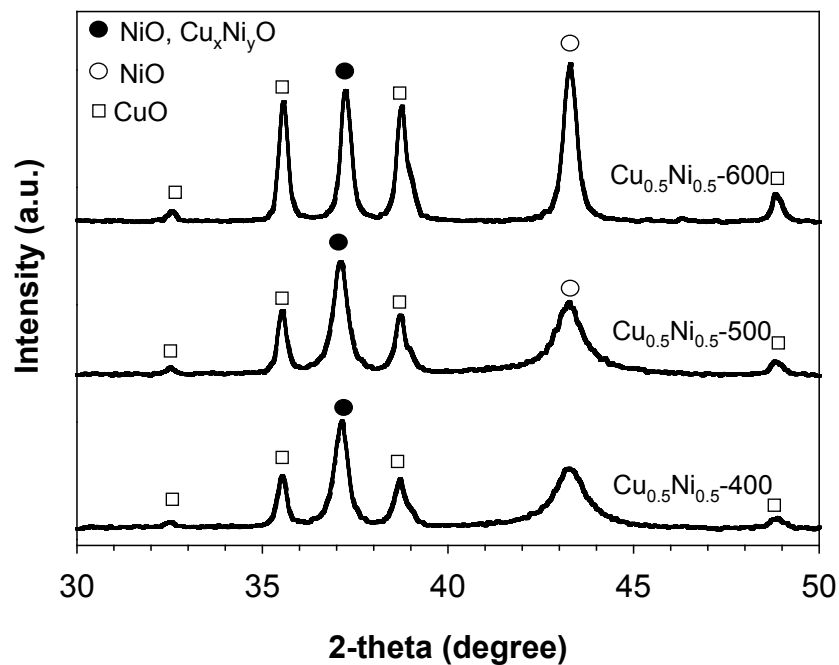

**Fig. S2** Wide-angle powder XRD patterns of mixed metal oxides prepared at different temperatures (as indicated) (Bruker SMART APEXII X-ray diffractometer with a  $\text{Cu K}_\alpha$  radiation).

H.Yen and F. Kleitz

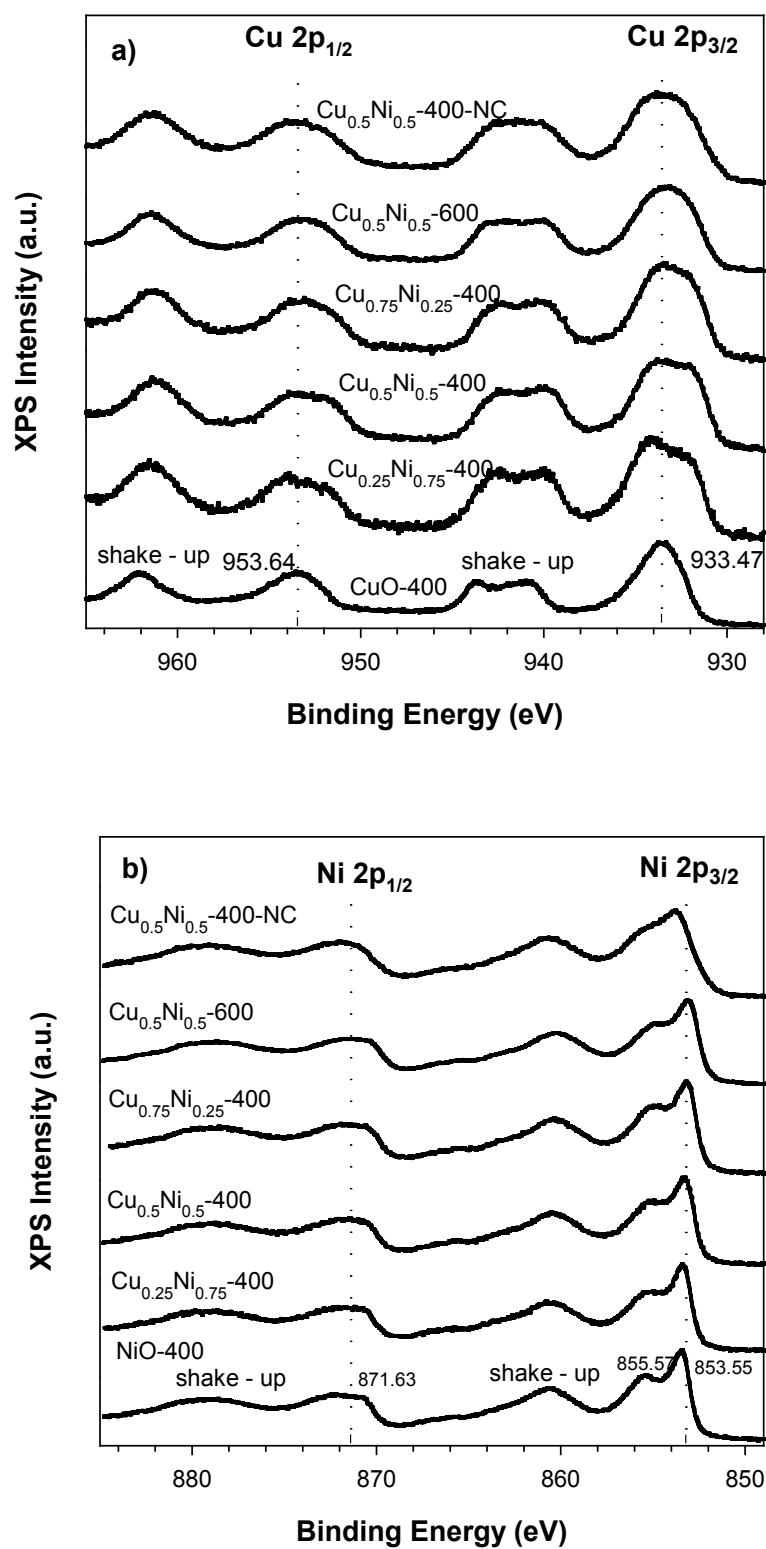

**Fig. S3a-b** XPS spectra of the prepared catalysts (the spectra are normalized by their peak intensity and energy corrected for adventitious carbon at 284.8eV).

H.Yen and F. Kleitz

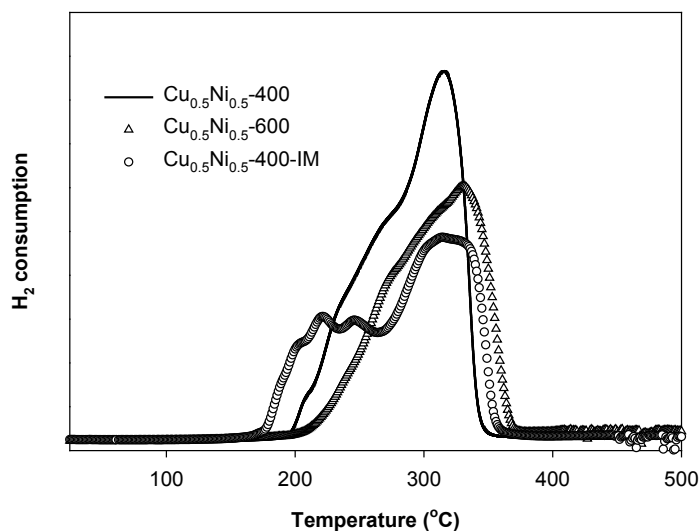

**Fig. S4** H<sub>2</sub>-TPR profiles of the samples prepared by one-step thermal treatment at 400°C and 600°C, and by post impregnation of copper nitrate on pre-formed NiO (as indicated).

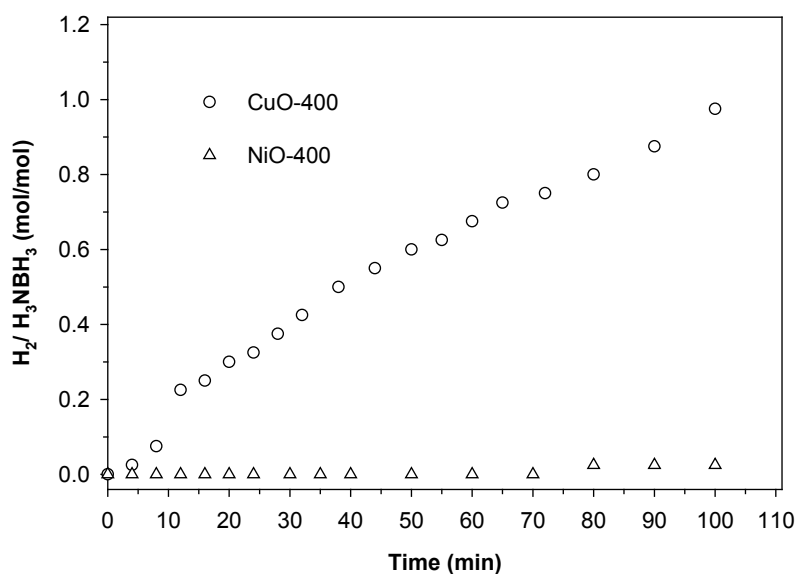

**Fig. S5** Volume of hydrogen generated from the hydrolysis of AB catalyzed by single oxides CuO and NiO, as a function of time (H<sub>3</sub>NBH<sub>3</sub>=1.48mmol, catalyst=10mg, H<sub>2</sub>O=10ml, T=25°C).

H.Yen and F. Kleitz

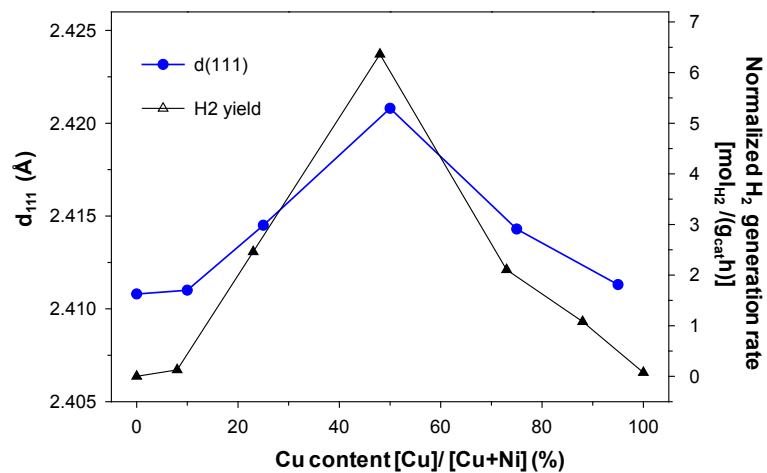

**Fig. S6** Plot representing the lattice d-spacing value, corresponding to the (111) plane, and reaction rate at half conversion, as functions of the catalyst composition.

H.Yen and F. Kleitz

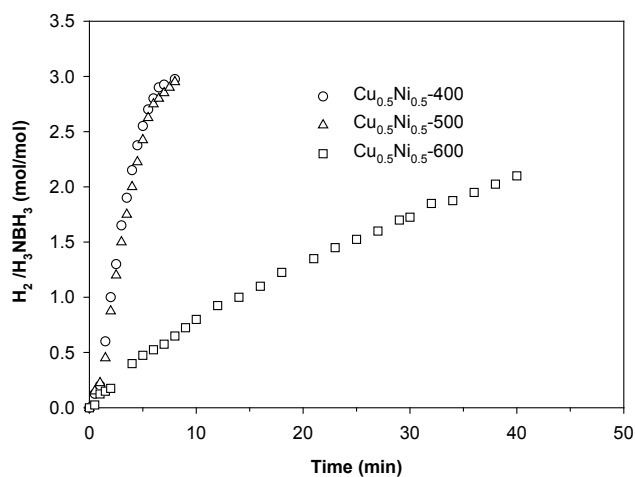

**Fig. S7** Time versus volume of hydrogen generated from the hydrolysis of AB catalyzed by binary CuO-NiO oxides prepared at different thermal treatment temperatures ( $\text{H}_3\text{NBH}_3=1.48\text{mmol}$ , catalyst=10mg,  $\text{H}_2\text{O}=10\text{ml}$ ,  $T=25^\circ\text{C}$ ).

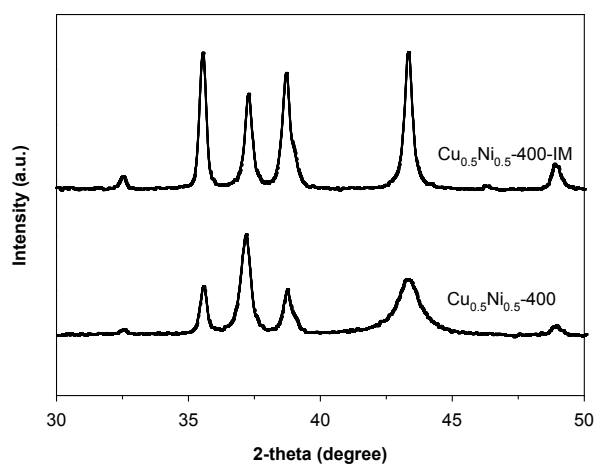

**Fig. S8** Comparison of the XRD patterns of the samples obtained by one-step thermal treatment and post-impregnation (as indicated).

H.Yen and F. Kleitz

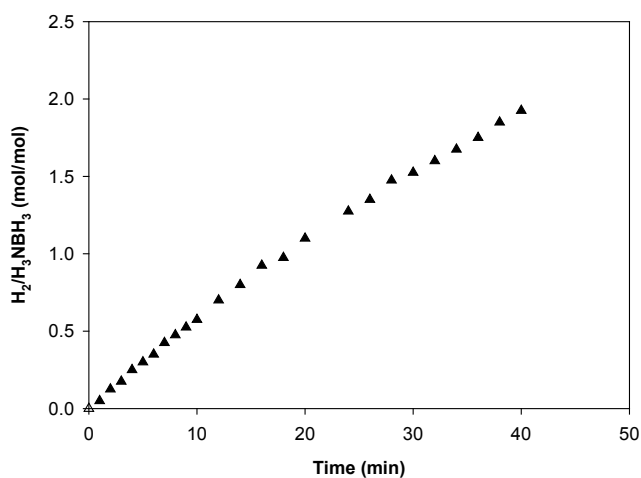

**Fig. S9** Time versus volume of hydrogen generated from the hydrolysis of AB catalyzed by Cu<sub>0.5</sub>Ni<sub>0.5</sub>-400-IM sample (H<sub>3</sub>NBH<sub>3</sub>=1.48mmol, catalyst=10mg, H<sub>2</sub>O=10ml, T=25°C).

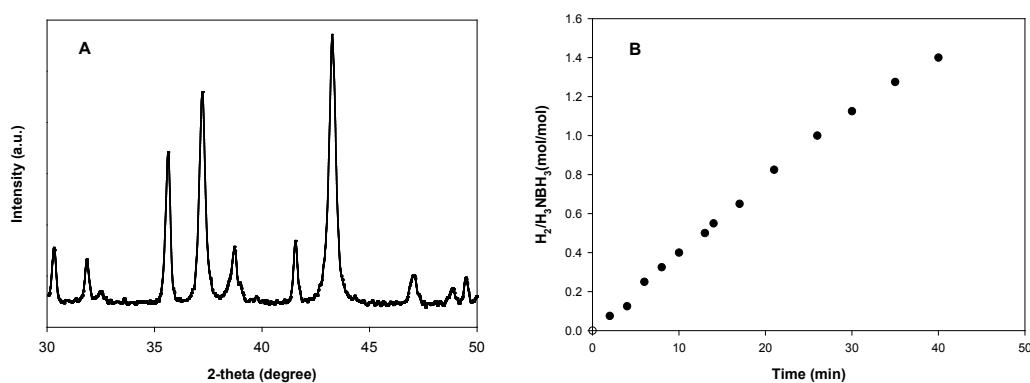

**Fig. S10** (A) XRD pattern and (B) Time versus volume of hydrogen generated from hydrolysis of AB catalyzed by binary CuO-NiO oxides sample prepared using copper chloride precursor (H<sub>3</sub>NBH<sub>3</sub>=1.48mmol, catalyst=10mg, H<sub>2</sub>O=10ml, T=25°C).

H.Yen and F. Kleitz

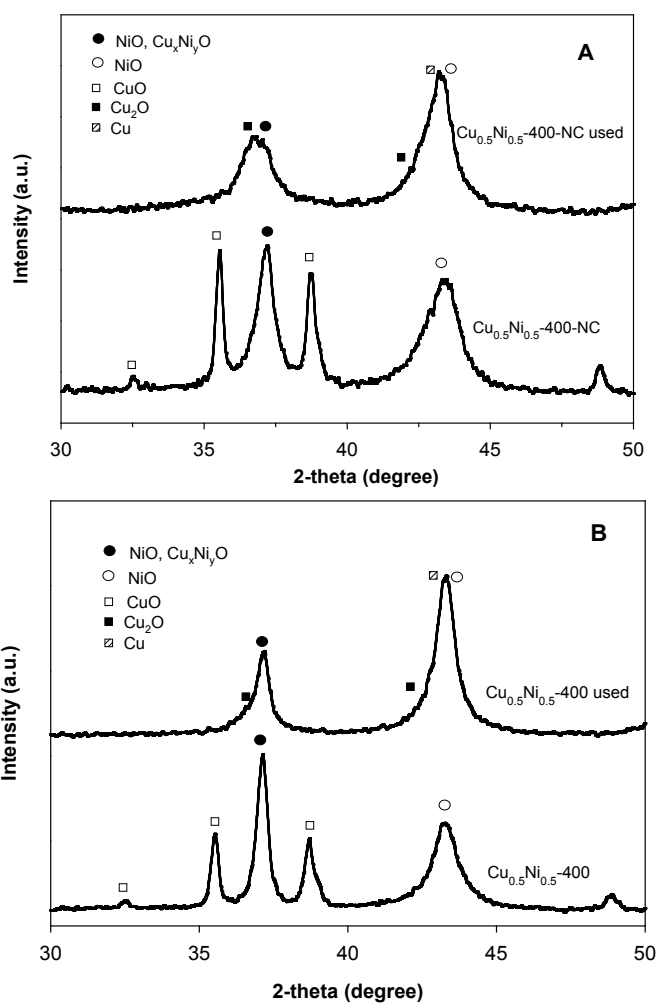

**Fig. S11** Wide-angle XRD patterns of the fresh and spent catalysts: (A) nanocast material, (B) material by thermal decomposition of nitrate salts.

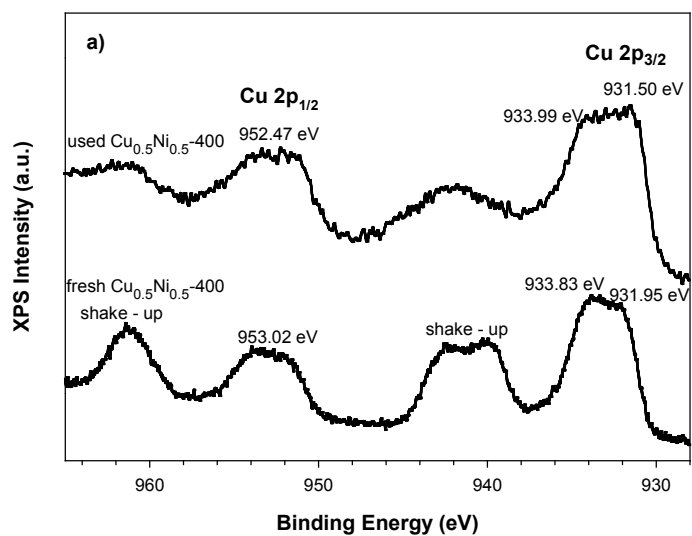



H.Yen and F. Kleitz

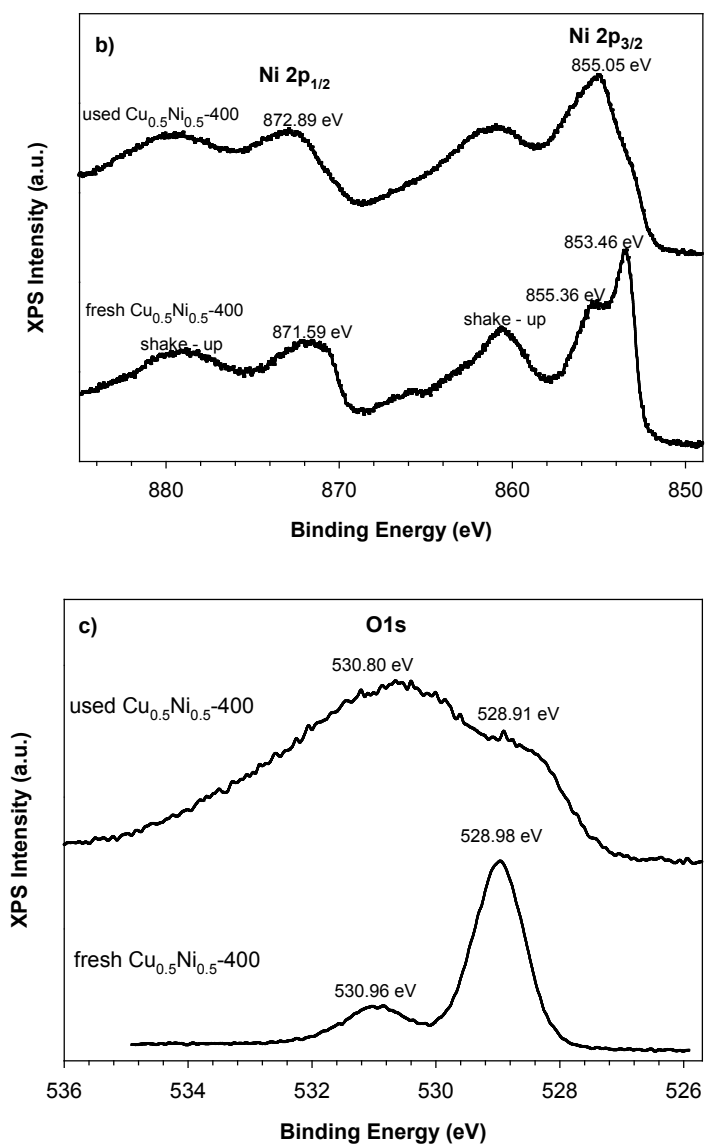

**Fig. S12a-c** XPS spectra of the fresh and used catalysts prepared via thermal decomposition (the spectra are normalized by their peak intensity and energy corrected for adventitious carbon at 284.8eV)

H.Yen and F. Kleitz

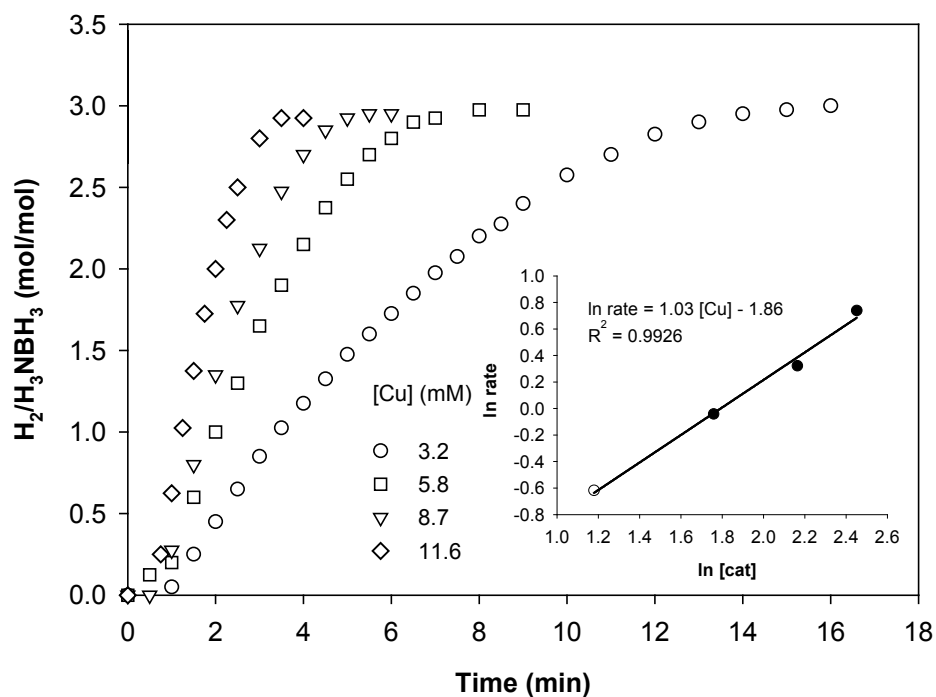

**Fig. S13** Plot of time versus volume of hydrogen generated using Cu<sub>0.5</sub>Ni<sub>0.5</sub>-400 at different catalyst concentrations ([AB] = 148 mmol, T = 25°C). (Inset: ln [Cu] vs ln rate plot).

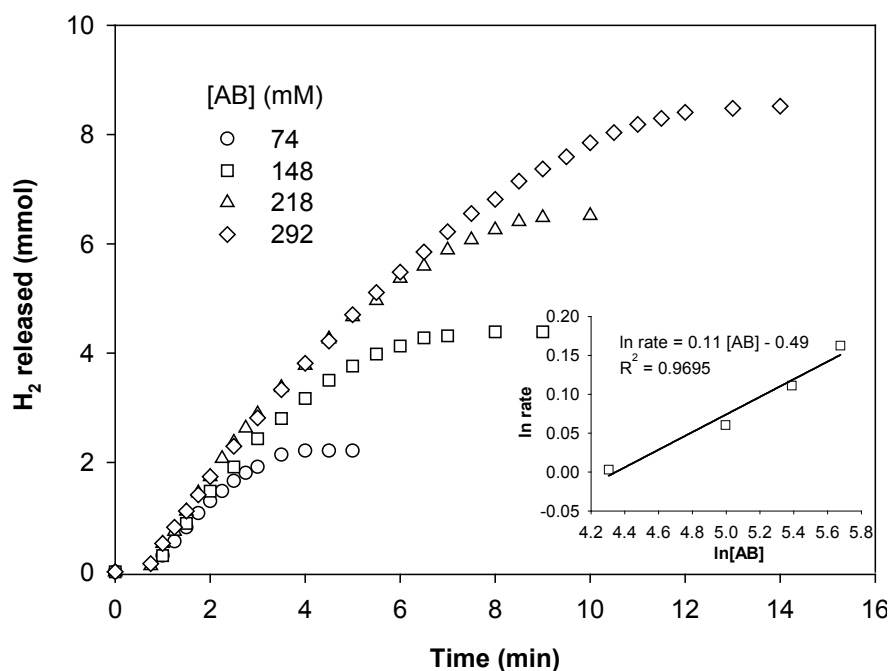

**Fig. S14** Plot of time versus volume of hydrogen generated from the hydrolysis of AB catalyzed by Cu<sub>0.5</sub>Ni<sub>0.5</sub>-400 at different AB concentrations ([Cu] = 5.8 mmol, T = 25°C). (Inset: ln[AB] vs ln rate plot)

H.Yen and F. Kleitz

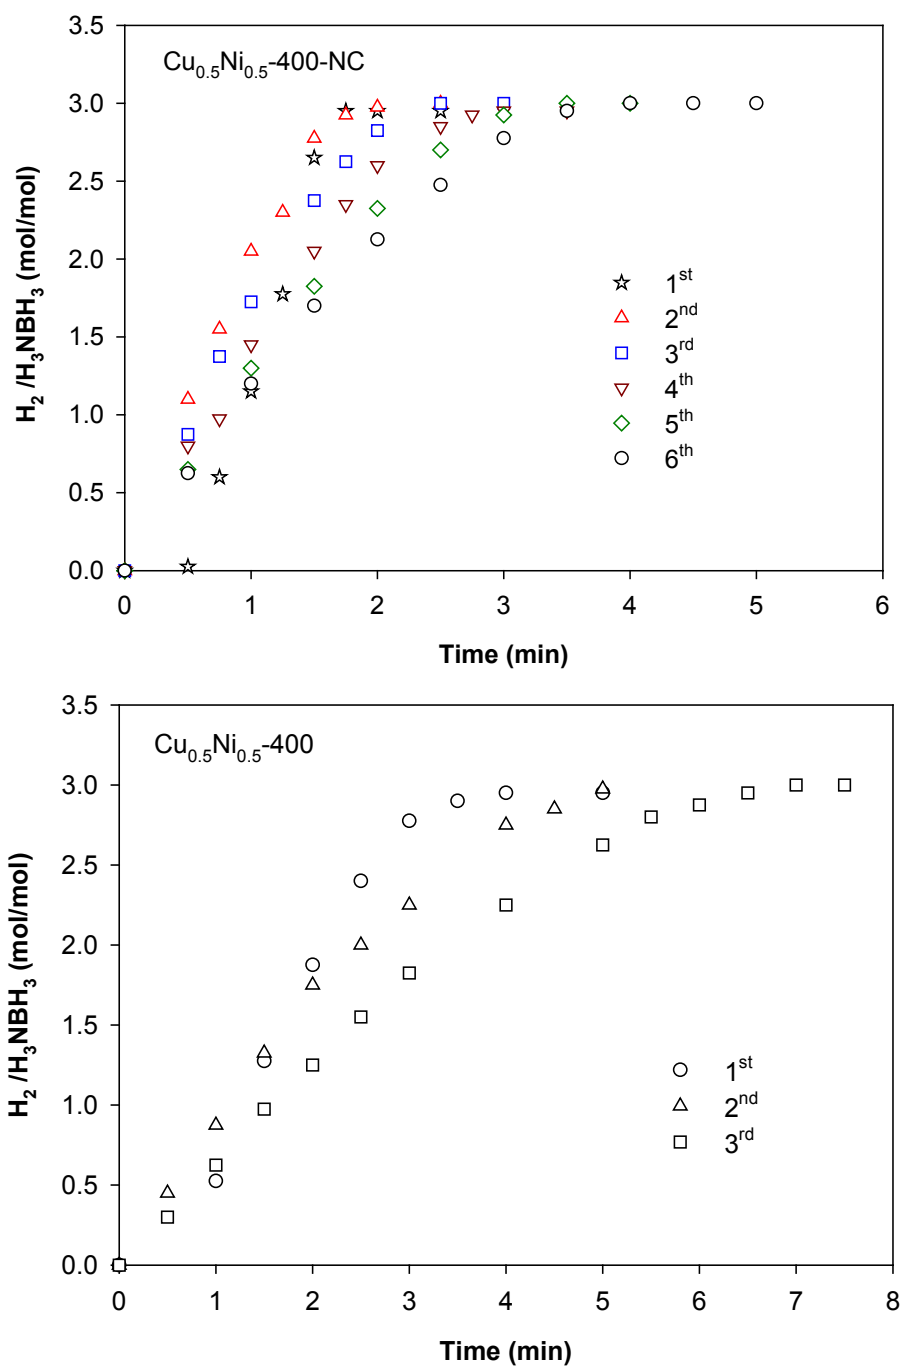

**Fig. S15** Time versus volume of hydrogen generated from the hydrolysis of AB catalyzed by  $\text{Cu}_{0.5}\text{Ni}_{0.5}\text{-400-NC}$  and  $\text{Cu}_{0.5}\text{Ni}_{0.5}\text{-400}$  over several cycles for reusability test. ( $[\text{Cu}] = 11.6\text{mmol}$ ,  $[\text{AB}] = 148\text{mmol}$ ,  $T = 25^\circ\text{C}$ ).

H.Yen and F. Kleitz

**Table S1** Textural and structural parameters of the prepared samples derived from nitrogen physisorption measurements at -196°C and X-ray diffraction.

| <b>Samples</b>                              | <b>S<sub>BET</sub><sup>a</sup><br/>(m<sup>2</sup>g<sup>-1</sup>)</b> | <b>d spacing of NiO<br/>(111) plane<sup>b</sup></b> |
|---------------------------------------------|----------------------------------------------------------------------|-----------------------------------------------------|
| Cu <sub>0.1</sub> Ni <sub>0.9</sub> -400    | 12                                                                   | 2.4119                                              |
| Cu <sub>0.25</sub> Ni <sub>0.75</sub> -400  | 11                                                                   | 2.4145                                              |
| Cu <sub>0.5</sub> Ni <sub>0.5</sub> -400    | 10                                                                   | 2.4208                                              |
| Cu <sub>0.75</sub> Ni <sub>0.25</sub> -400  | 3                                                                    | 2.4143                                              |
| Cu <sub>0.9</sub> Ni <sub>0.1</sub> -400    | 3                                                                    | 2.4113                                              |
| Cu <sub>0.5</sub> Ni <sub>0.5</sub> -500    | 8                                                                    | 2.4233                                              |
| Cu <sub>0.5</sub> Ni <sub>0.5</sub> -600    | 7                                                                    | 2.4145                                              |
| Cu <sub>0.5</sub> Ni <sub>0.5</sub> -400-IM | 12                                                                   | 2.4120                                              |
| Cu <sub>0.5</sub> Ni <sub>0.5</sub> -400-NC | 73                                                                   | 2.4162                                              |
| CuO-400                                     | 3                                                                    | -                                                   |
| NiO-400                                     | 28                                                                   | 2.4108                                              |

<sup>a</sup> S<sub>BET</sub>, apparent BET specific surface area deduced from the isotherm analysis in the relative pressure range from 0.05 to 0.20; <sup>b</sup> Obtained from XRD.

**Table S2** Nominal and actual molar Cu/Ni ratios of the prepared composite oxides.

| <b>Samples</b>                                   | <b>Nominal<br/>Cu/Ni ratio</b> | <b>Actual Cu/Ni ratio<br/>in the bulk</b> | <b>Surface<br/>Cu/Ni ratio</b> |
|--------------------------------------------------|--------------------------------|-------------------------------------------|--------------------------------|
| Cu <sub>0.25</sub> Ni <sub>0.75</sub> -400       | 0.33                           | 0.30                                      | 0.21                           |
| Cu <sub>0.5</sub> Ni <sub>0.5</sub> -400         | 1.00                           | 0.89                                      | 0.23                           |
| Cu <sub>0.75</sub> Ni <sub>0.25</sub> -400       | 3.00                           | 2.56                                      | 0.21                           |
| Cu <sub>0.5</sub> Ni <sub>0.5</sub> -400-<br>NC* | 1.00                           | 0.85                                      | 0.55                           |
| Cu <sub>0.5</sub> Ni <sub>0.5</sub> -600         | 1.00                           | 0.87                                      | 0.57                           |

\*The Si content determined by XPS is about 2.78 at% in the nanocast Cu<sub>0.5</sub>Ni<sub>0.5</sub>-400-NC sample.
